# Supplementary material for: Informal genomic surveillance of regional distribution of Salmonella Typhi genotypes and antimicrobial resistance via returning travellers
Source: PubMed Central journal article supplement (PMC6741848; doi:10.1371/journal.pntd.0007620), 2019-09-12
Supplement: pntd.0007620.s001.pdf [file pntd.0007620.s001.pdf]

a

### S. Typhi phylogeny

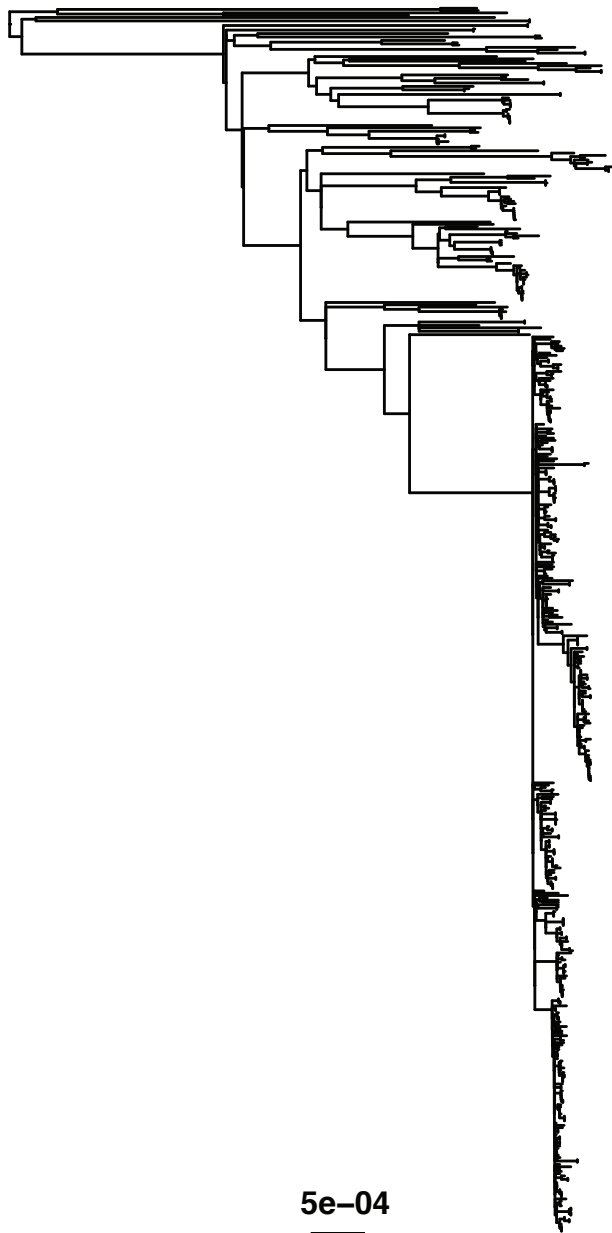

b

### Plasmids

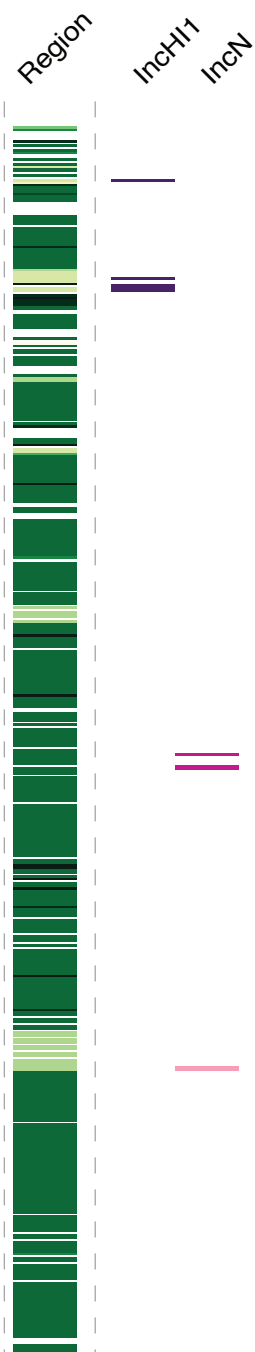

c

### AMR

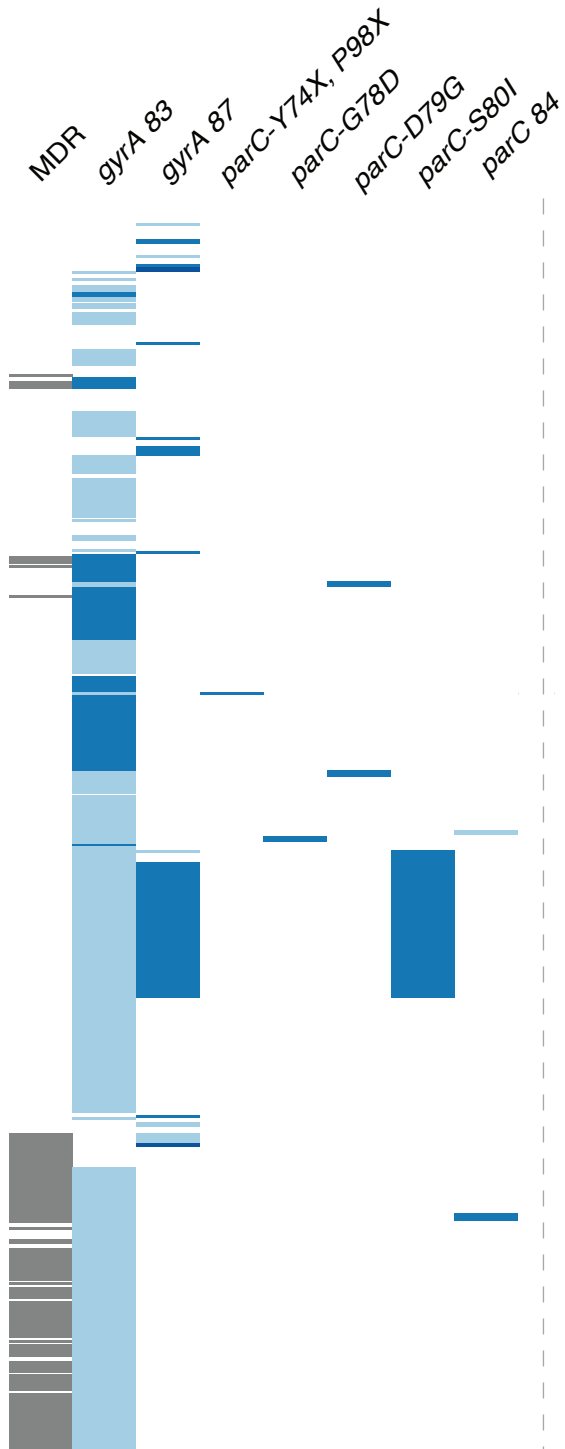

d

### IS elements

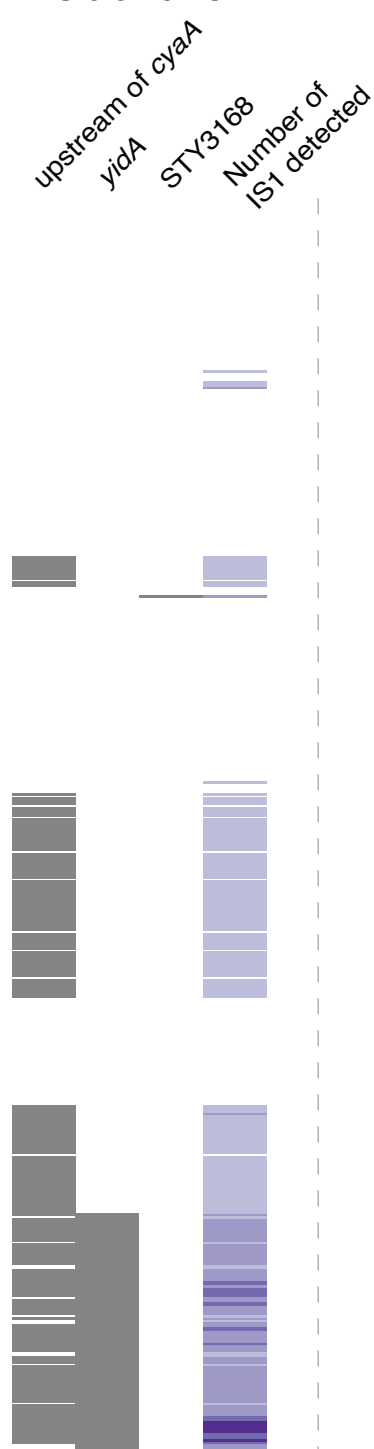

### Legend

#### Region

- North America
- South America
- West Africa
- East Africa
- North Africa
- Europe
- Middle East
- South Asia
- Central Asia
- South East Asia
- Multiple

#### IncHI1

- pST2

#### IncN

- pST5
- pST3

#### *gyrA* 83

- gyrA*-S83F
- gyrA*-S83Y

#### *gyrA* 87

- gyrA*-D87G
- gyrA*-D87N
- gyrA*-D87Y

#### *parC* 84

- parC*-E84G
- parC*-E84K

#### Number of IS sites

- 1
- 2
- 3
- 4
